# Supplementary material for: Pooled error variance and covariance estimation of sparse in situ soil moisture sensor measurements in agricultural fields in Flanders
Source: Copernicus journal article supplement (doi:10.5194/soil-11-435-2025), 2025-06-13
Supplement: Supplementary file 1 [file soil-11-435-2025-supplement.pdf]

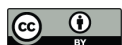

## *Supplement of*

# **Pooled error variance and covariance estimation of sparse in situ soil moisture sensor measurements in agricultural fields in Flanders**

**Marit G. A. Hendrickx et al.**

*Correspondence to:* Marit G. A. Hendrickx ([marit.hendrickx@kuleuven.be](mailto:marit.hendrickx@kuleuven.be))

The copyright of individual parts of the supplement might differ from the article licence.

## S1. TEROS 10 lab-based sensor calibration

TEROS 10 sensor accuracy and reproducibility was tested in the lab in homogeneous soil columns. The sensor was tested in five different soil types, including silt loam, sandy loam and loamy sand soils from agricultural fields, glauconite sand, and silica sand (Sibelco). The loamy sand soil had a high organic carbon content of 3.76 %OC. The soil was wetted homogeneously to obtain different moisture contents. The soil columns were prepared in a cylinder with an inner diameter of 19 cm and 14.1 cm height, which corresponds to a volume of 4.00 L and was larger than the sensor measurement volume of influence. The cylinder was divided in 10 equal sections which were filled with soil and compacted using a wooden tool consecutively to obtain a target bulk density of 1.3 g cm<sup>-3</sup>. The reference soil moisture content was measured using the gravimetric method as a control measurement.

Once the soil column was prepared, it was covered with plastic foil. The sensor was inserted and the sensor head was embedded in soil by filling an additional cylinder with soil on top of the original soil column. The sensor reading was marked down twice without removing the sensor. Then, the sensor was removed and re-inserted, and again, two sensor readings were marked down. The calibration equation for third-party loggers (Eq. (1)) was applied to convert the raw sensor reading in mV to volumetric soil moisture content (m<sup>3</sup> m<sup>-3</sup>) (TEROS 10, 2024).

The TEROS 10 sensor showed a standard deviation of 0.0002 m<sup>3</sup> m<sup>-3</sup> for repeated readings, indicating minimal noise and very good reproducibility of the sensor readings, and 0.0056 m<sup>3</sup> m<sup>-3</sup> after re-insertion, indicating low measurement variability due to sensor re-insertion in a homogeneous soil. Without additional calibration, an RMSE of 0.034 m<sup>3</sup> m<sup>-3</sup> was obtained, which matches the expected accuracy of 0.03 m<sup>3</sup> m<sup>-3</sup> as described by the manufacturer (TEROS 10, 2024). The deviation of the measurements in the loamy sand soil may be due to the high organic carbon.

A linear regression was fitted ( $y = 0.011 + 0.863x$ ) with  $R^2 = 0.96$  and  $RMSE = 0.024 \text{ m}^3 \text{ m}^{-3}$  (Fig. S1). This equation was converted to a sensor calibration equation to get the true soil moisture content ( $\theta = -0.013 + 1.16 \times \theta_{\text{sensor,nocal}}$ ) which is similar to the field-based pooled sensor calibration that was described in the main text (Eq. (3):  $\theta_{\text{sensor}} = -0.006 + 1.26 \times \theta_{\text{sensor,nocal}}$ ).

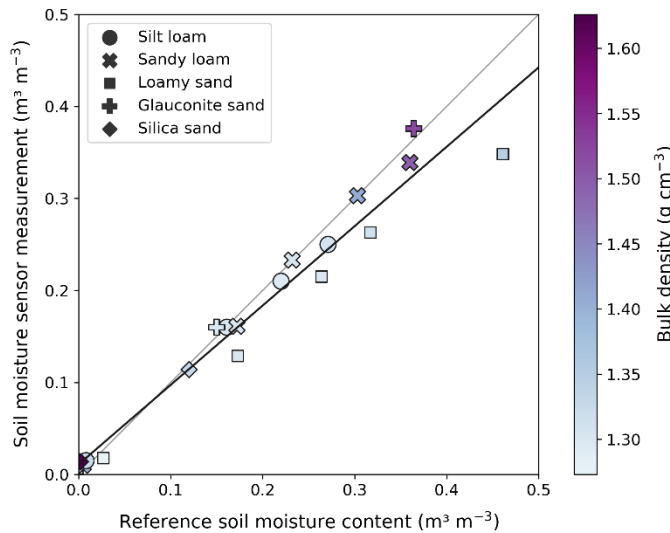

**Fig. S1 Lab-based sensor calibration:  $y = 0.011 + 0.863x$  ( $R^2 = 0.96$ ,  $RMSE = 0.024 \text{ m}^3 \text{ m}^{-3}$ )**

## S2. Semivariogram

A semivariogram was constructed to assess the degree of small-scale spatial correlation of SWC within a MZ. The semivariance ( $\gamma$ ) for a distance  $h$  can be quantified as

$$\gamma(h) = \frac{1}{2N(h)} \sum_{i=1}^{N(h)} [\theta(x_i) - \theta(x_i + h)]^2,$$

where  $N(h)$  is the number of data pairs separated by a distance  $h$ , while  $\theta(x_i)$  is the SWC at location  $x_i$ .

- 30 Data from field trials with four MZs in 2022 and 2023 at the research center (*Proefstation voor de Groenteteelt*) were used to calculate the semivariances for distances of 1 m, 2 m, and 3 m (Fig. S2). Only measurement times at which all 12 sensors provided data were included, resulting in 65 days of measurements in 2022 and 57 days of measurements in 2023. Within each MZ, the first and second sensors were positioned 1 m apart, the second and third sensors were 2 m apart, and the first and third sensors were separated by 3 m. As a result, each distance (1 m, 2 m, and 3 m) was represented by an equal number of sensor
- 35 pairs (4). The semivariances were first aggregated by year, combining data from all measurement times and sensor pairs at each specific distance. Subsequently, a weighted average of the semivariances was calculated across the two years, accounting for the varying number of measurement days each year, so that each distance is now represented by 8 sensor pairs.

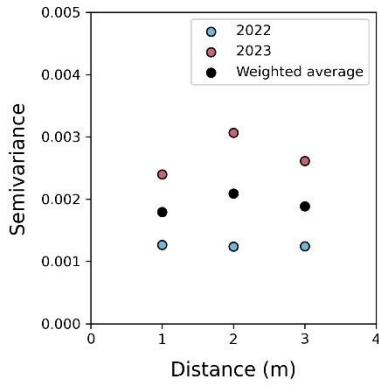

40 **Fig. S2 Semivariogram on MZ scale resulting from two field trials (2022 and 2023). For each growing season, the semivariances were calculated for 1 m, 2 m and 3 m distance, and the weighted average was computed taking into account the measurement days in each year (black).**

- Interestingly, the small-scale semivariances did not exhibit the expected exponential increase with distance; instead, they remained relatively invariant across the different distances examined. This suggests that SWC is relatively uniform and does not vary significantly with distance at this scale. This uniformity could imply that the factors influencing SWC in the MZs are
- 45 acting consistently across these small spatial scales. To gain more detailed insights into the spatial variability of SWC within the measurement zones, a denser sensor network, more repeated measurements across a larger area, and additional measurements at distances smaller than 1 m and larger than 3 m would be beneficial.

### S3. Irrigation method dependent systematic deviation

50 The pooled error model was based on a dataset of cropping cycles involving various irrigation methods. The majority of the cropping cycles were irrigated using either a reel irrigation system with an irrigation cannon (46 cropping cycles) or drip irrigation (37 cropping cycles). The remaining cropping cycles used sprinklers (6 cropping cycles) or lateral move irrigation (4 cropping cycles).

55 Systematic deviations of sensor measurements compared to the ‘true’ SWC in a MZ measured with a composite soil moisture sample can be expected to vary by irrigation method. A sensor-specific intercept represents these systematic deviations, where a negative intercept corresponds with an overestimation of SWC by the sensor compared to the composite soil moisture sample, while a positive intercept indicates an underestimation. In cropping cycles using drip irrigation, negative intercepts were more common than positive intercepts, suggesting that sensors often overestimated SWC compared to the composite soil moisture sample (Fig. S3). This is likely because the sensors were located close to the dripper lines, within or near the wetting bulb, while soil moisture samples were taken at various locations between the dripper lines.

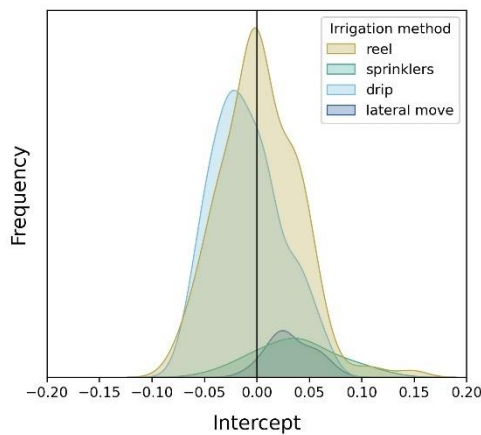

**Fig. S3 Density plot of the sensor-specific intercepts grouped by irrigation method. A negative intercept corresponds with an overestimation of SWC by the sensor, while a positive intercept corresponds with an underestimation of SWC by the sensor.**

These results indicate that systematic deviations vary depending on the irrigation method used. Therefore, it can be argued that a separate error model for each irrigation method may be necessary. The same might apply for soil type, but this effect could not be assessed in this study as loamy sand (Belgian soil classification: S) heavily predominated the dataset compared to coarser sandy soils as well as finer loamy soils. Developing a separate error model for specific irrigation methods and/or soil types could possibly better address the unique characteristics and deviations of sensors under various conditions, leading to a more accurate understanding of systematic deviations. Nevertheless, this would require an extensive amount of data for each specific condition.
